# Supplementary material for: Gut microbiome of treatment-naïve MS patients of different ethnicities early in disease course
Source: PubMed Central journal article supplement (PMC6841666; doi:10.1038/s41598-019-52894-z), 2019-11-08
Supplement: 41598_2019_52894_MOESM1_ESM.pdf [file 41598_2019_52894_MOESM1_ESM.pdf]

## **Gut microbiome of treatment-naïve MS patients of different ethnicities early in disease course**

R.E. Ventura, MD PhD<sup>\*</sup>, T. Iizumi, MD PhD<sup>ac</sup>, T. Battaglia<sup>a</sup>, Menghan Liu<sup>a</sup>, G.I. Perez-Perez, DSc<sup>a</sup>, J. Herbert, MD<sup>+</sup>, M.J. Blaser, MD<sup>abc</sup>

<sup>a</sup>Department of Medicine, New York University School of Medicine, New York, NY USA

<sup>b</sup>Department of Microbiology, New York University School of Medicine, New York, NY USA

<sup>c</sup>Center for Advanced Biotechnology and Medicine, Rutgers University, Piscataway, NJ USA

+Deceased

### **Corresponding Author:**

Rachel Ventura, MD, PhD

[rachel.ventura@gmail.com](mailto:rachel.ventura@gmail.com)

220 Riverside Boulevard Apt 14M

New York, NY 10069

Telephone: 917-312-2160

## Figure Legends

**Figure S1. Community characteristics of the fecal microbiota from 45 MS patients and 44 control subjects, comparing the three ethnic groups to one another.** Shown are representations of Alpha-diversity, based on Phylogenetic Distance score (Panels a,b), and PCoA plot of Beta-diversity, based on Unweighted UniFrac analysis (Panels c,d).

**Figure S2. Community characteristics of the fecal microbiota from the MS patients and control subjects, comparing those at or above versus below age 30.** Shown is a representation of Alpha-diversity, based on Phylogenetic Distance score (Panel a), and PCoA plots of Beta-diversity, based on Unweighted UniFrac analysis (Panels b-e). By Adonis testing, there were significant differences in Beta-diversity among MS subjects by age (\* $p=0.04$ ), and in those under 30, between the MS patients and the controls (\* $p=0.03$ ).

**Figure S3. Community characteristics of the fecal microbiota from the MS patients and control subjects, stratified by probiotic usage.** Shown are representations of Alpha-diversity based on Phylogenetic Distance score (Panel a) and PCoA plots of Beta-diversity, based on the Unweighted UniFrac analysis (Panels b-e). By Adonis testing, there was a significant difference in Beta-diversity between MS and control subjects who were not taking probiotics (\* $p=0.03$ ).

**Figure S4. Relative abundances of *Clostridium* species in the fecal samples, according to clinical status and ethnicity.** Data are shown as Medians + Interquartile Range (IQR) and 95% Confidence Intervals in box and whiskers plots. Differences between MS cases and controls were significant in all three ethnic groups, by LEfSe analysis (see **Figure 2**).

a.

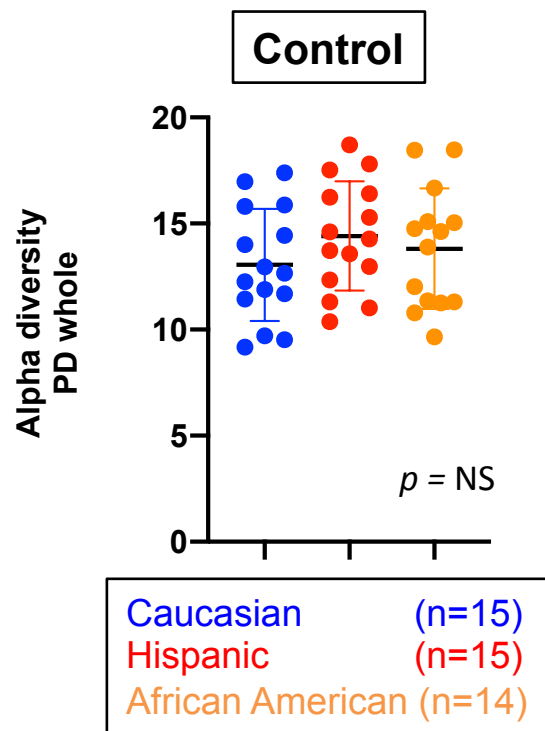

b.

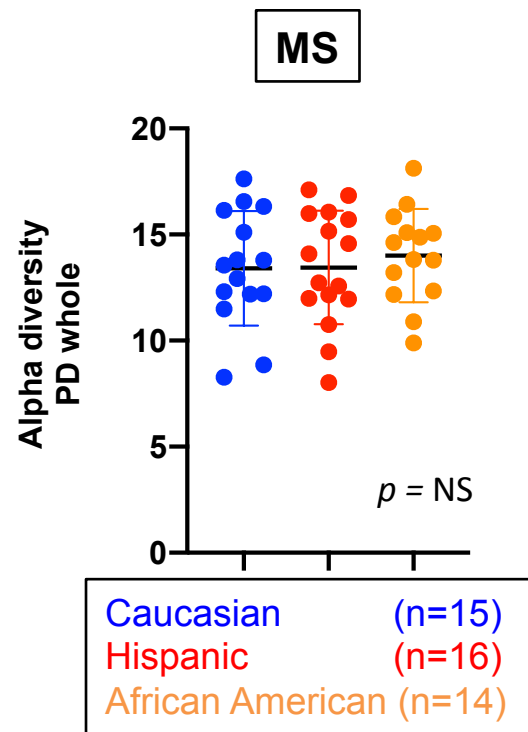

c.

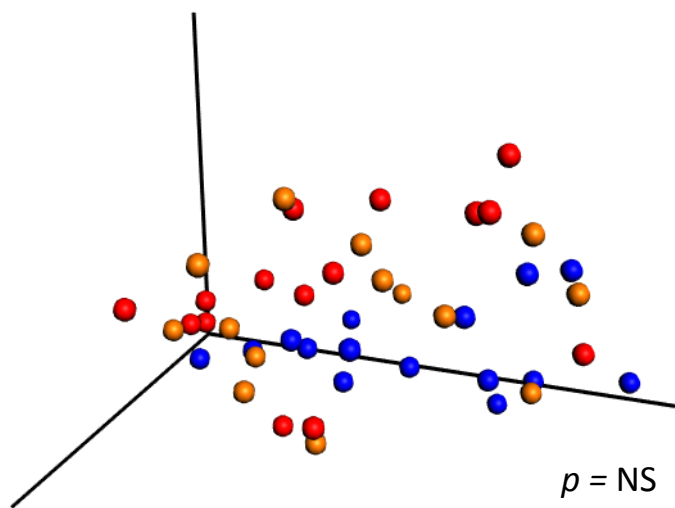

d.

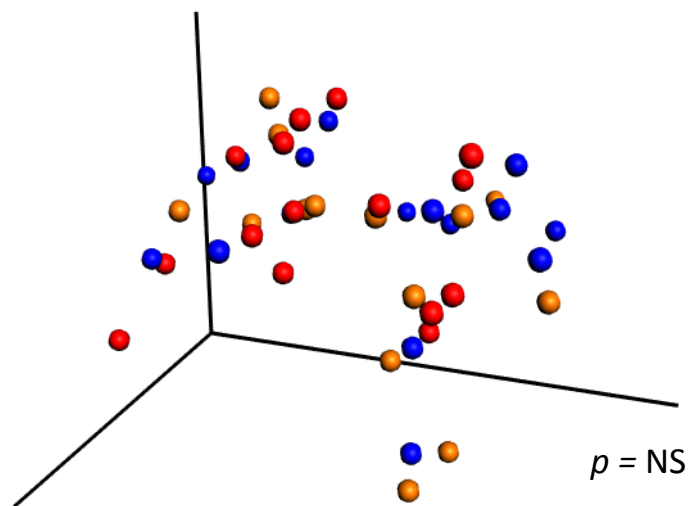

Figure S1.

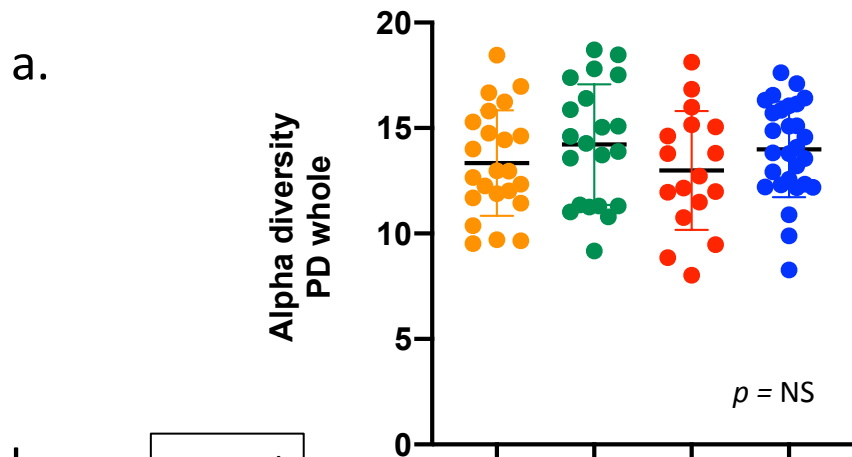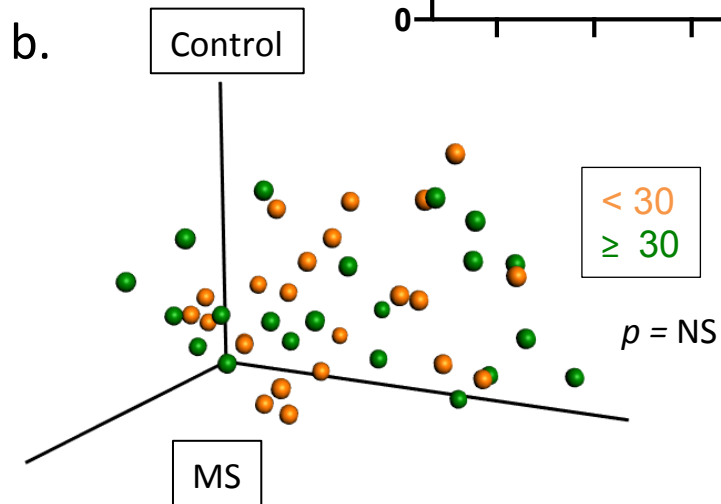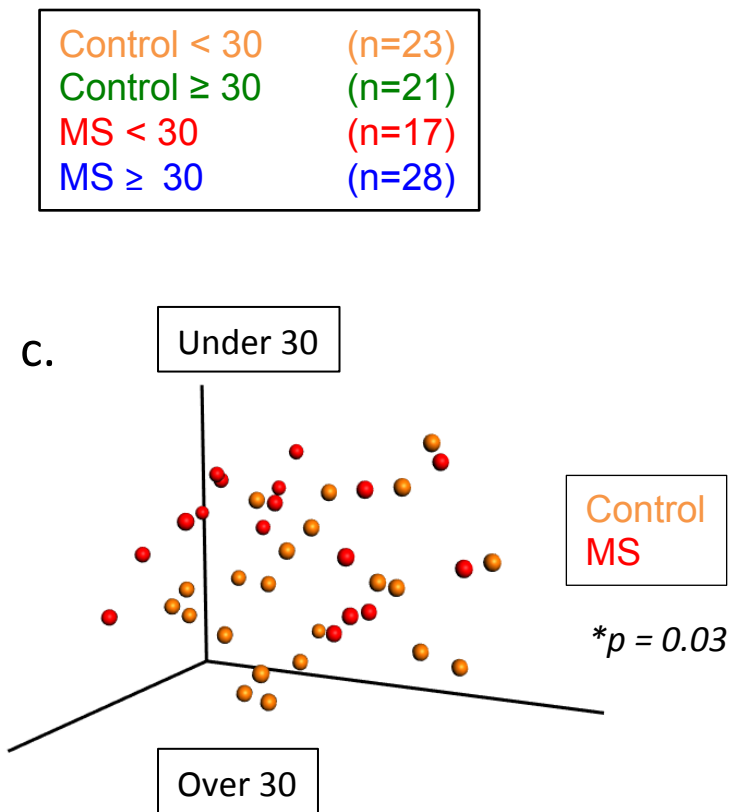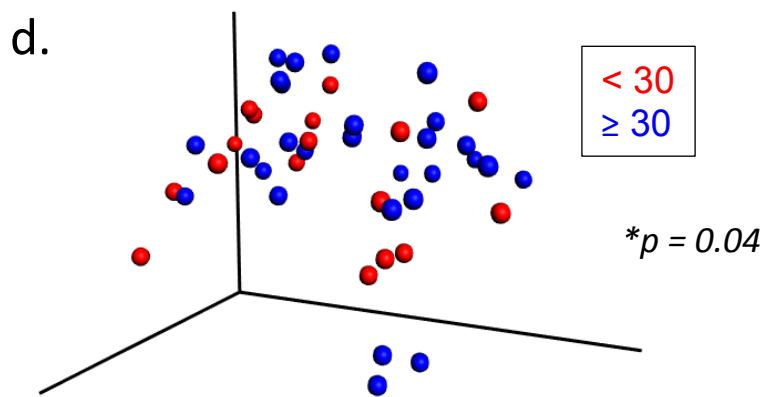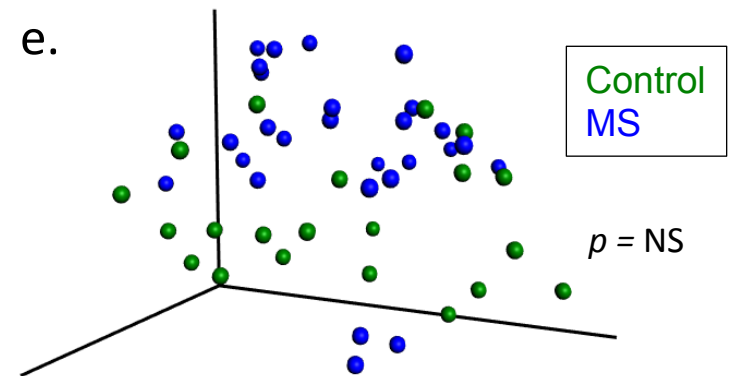

Figure S2.

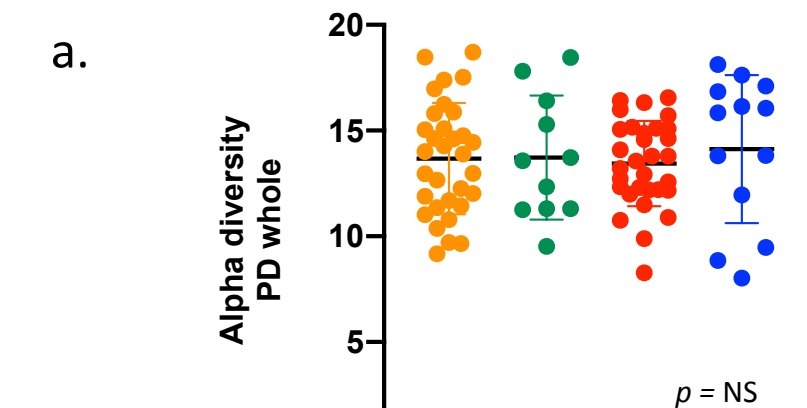

|                        |        |
|------------------------|--------|
| Control probiotics (-) | (n=32) |
| Control probiotics (+) | (n=12) |
| MS probiotics (-)      | (n=31) |
| MS probiotics(+)       | (n=13) |

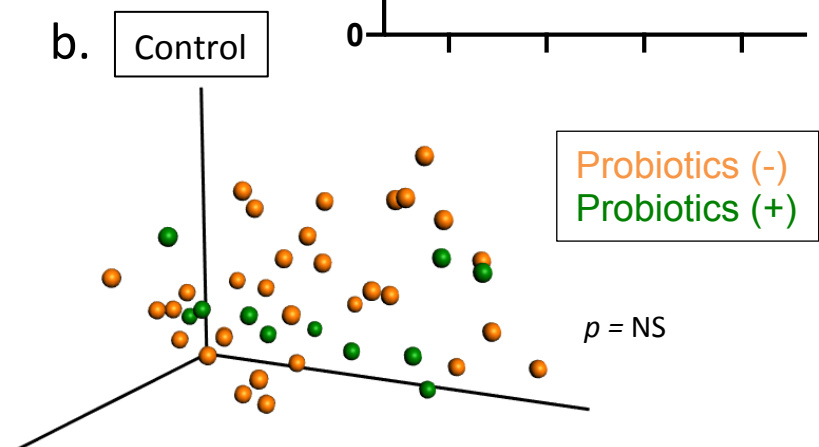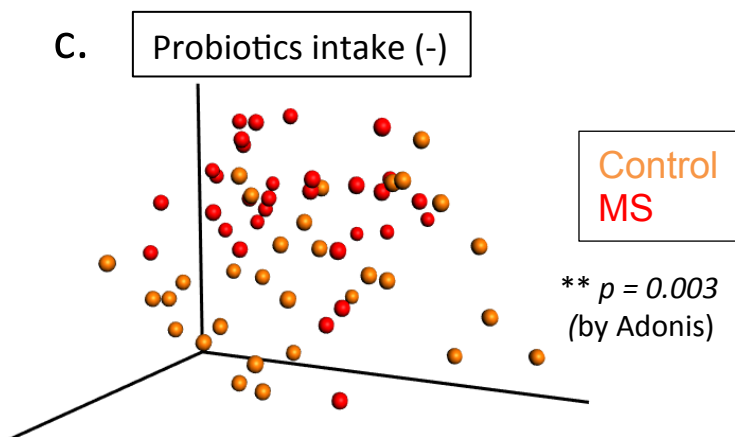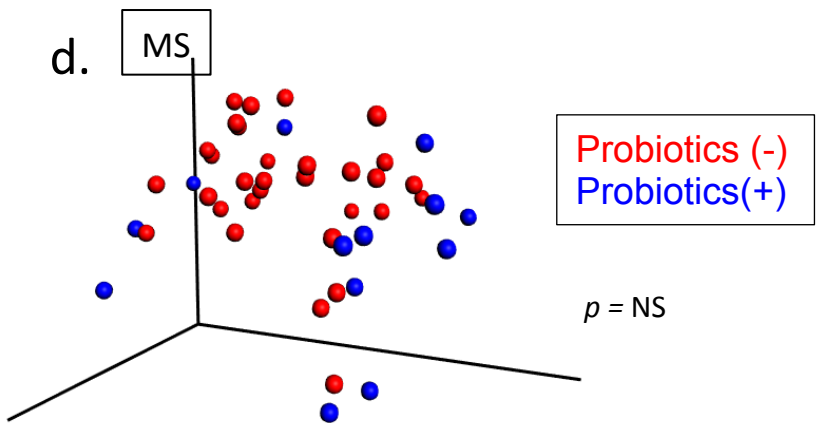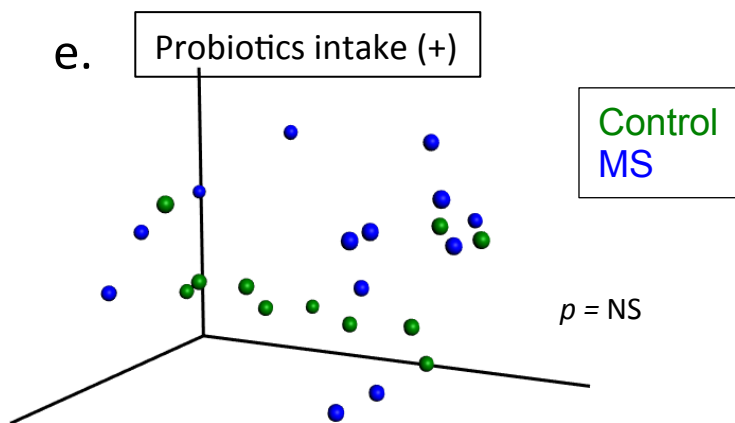

Figure S3.

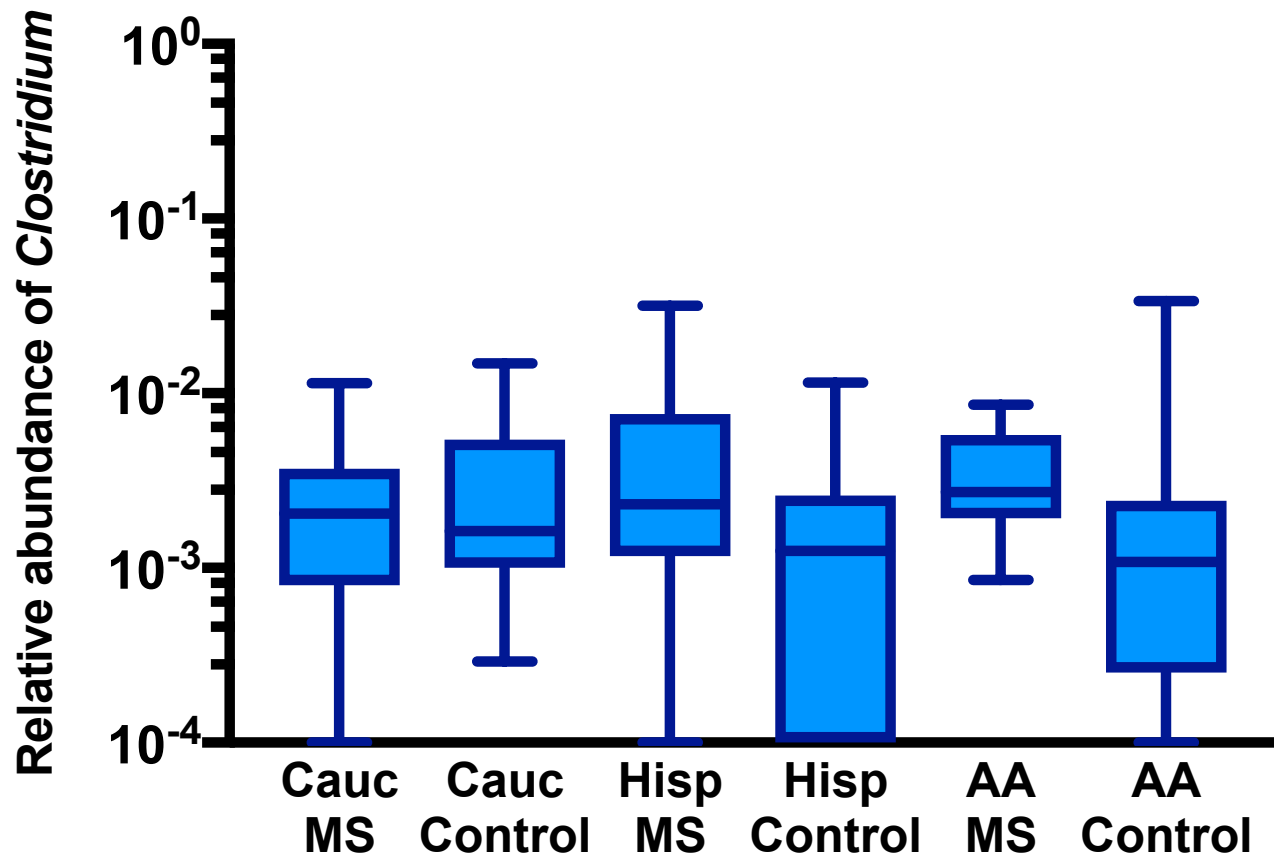

Figure S4.
